# Supplementary material for: Covered SEMS failed to cure airway fistula closed by an amplatzer device
Source: Springer Nature journal article supplement (doi:10.1186/s12890-023-02548-8), 2023-07-20
Supplement: 12890_2023_2548_MOESM1_ESM.pdf [file 12890_2023_2548_MOESM1_ESM.pdf]

This document certifies that the manuscript

## **Covered SEMS failed to cure airway fistula closed by an Amplatzer device**

prepared by the authors

**Huibin Lu; Yahua Li; Kewei Ren; Zongming Li; Juanfang Liu; Xuhua Duan; Jianzhuang Ren; Xinwei Han**

was edited for proper English language, grammar, punctuation, spelling, and overall style by one or more of the highly qualified native English speaking editors at AJE.

This certificate was issued on **May 13, 2023** and may be verified on the [AJE website](#) using the verification code **E7DF-7DCD-EF81-ECBC-459E**.

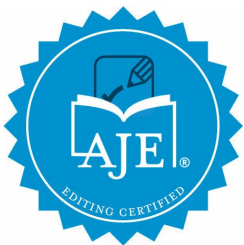

Neither the research content nor the authors' intentions were altered in any way during the editing process. Documents receiving this certification should be English-ready for publication; however, the author has the ability to accept or reject our suggestions and changes. To verify the final AJE edited version, please visit our verification page at [aje.com/certificate](#). If you have any questions or concerns about this edited document, please contact AJE at [support@aje.com](mailto:support@aje.com).
